# Supplementary material
Source: PubMed Central journal article supplement (PMC2700537)
Supplement: tpc.109.066324_1.pdf [file tpc.109.066324_1.pdf]

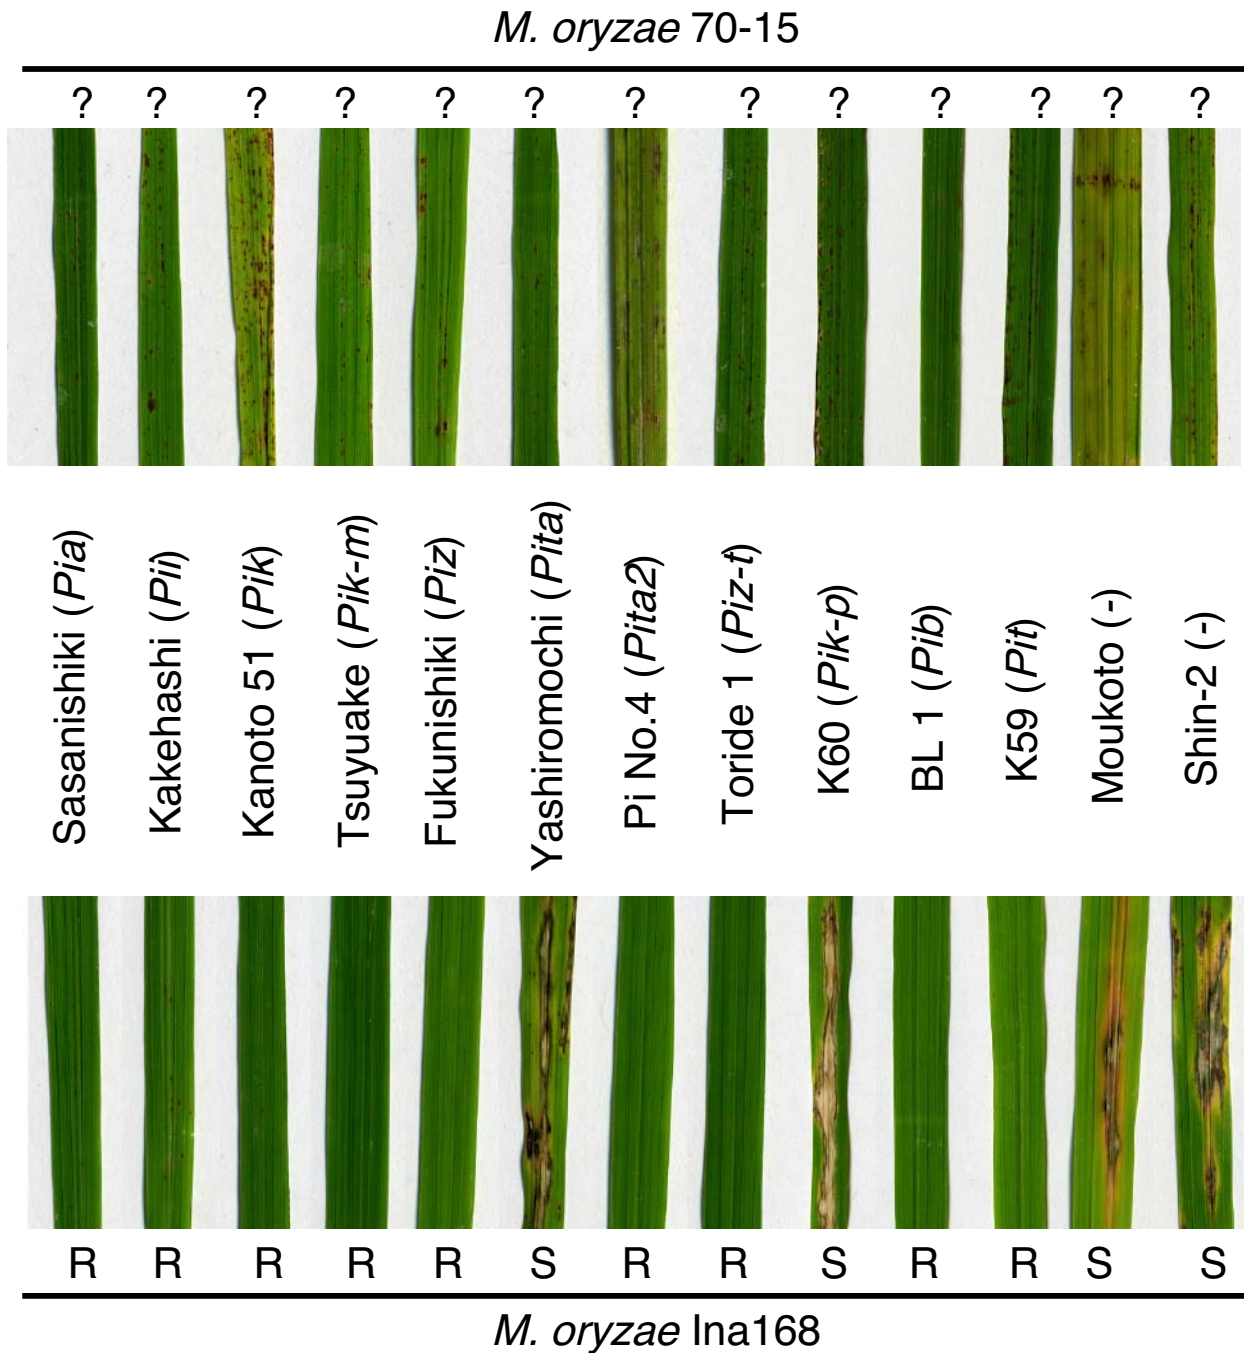

**Supplemental Figure 1. Ambiguous symptoms caused by 70-15 isolate infected to various rice cultivars.** Each isolate was sprayed onto the leaves of diagnostic rice cultivars differentially harboring eleven known resistance (*R*-) genes, *Pia*, *Pii*, *Pik*, *Pik-m*, *Pik-p*, *Piz*, *Pita*, *Pita2*, *Piz-t*, *Pib*, *Pit* cognate to the *AVR* genes (Kiyosawa, 1986) as well as susceptible cultivars Moukoto and Shin-2, and compatible or incompatible interaction was observed among them. It is notable that in our experiments, the reaction between the isolate 70-15 and these eleven rice *R*-genes could not be precisely defined since the disease symptoms caused by 70-15 were not clear, and we could not assign each reaction as compatible or incompatible. In addition, 70-15-inoculated Moukoto and Shin-2 also showed unclear symptoms. On the contrary, Ina168 induced typical susceptible spindle-shaped lesions on Yahiromochi, K60, Moukoto and Shin-2 leaves, and typical resistance symptoms (few small brown spots) on the leaves of the other cultivars. Photos were taken 10 days after inoculation with  $5 \times 10^5$  conidia/ml (containing 0.01 % tween 20) of 70-15 or  $3 \times 10^5$  conidia/ml (containing 0.01 % tween 20) of Ina168.

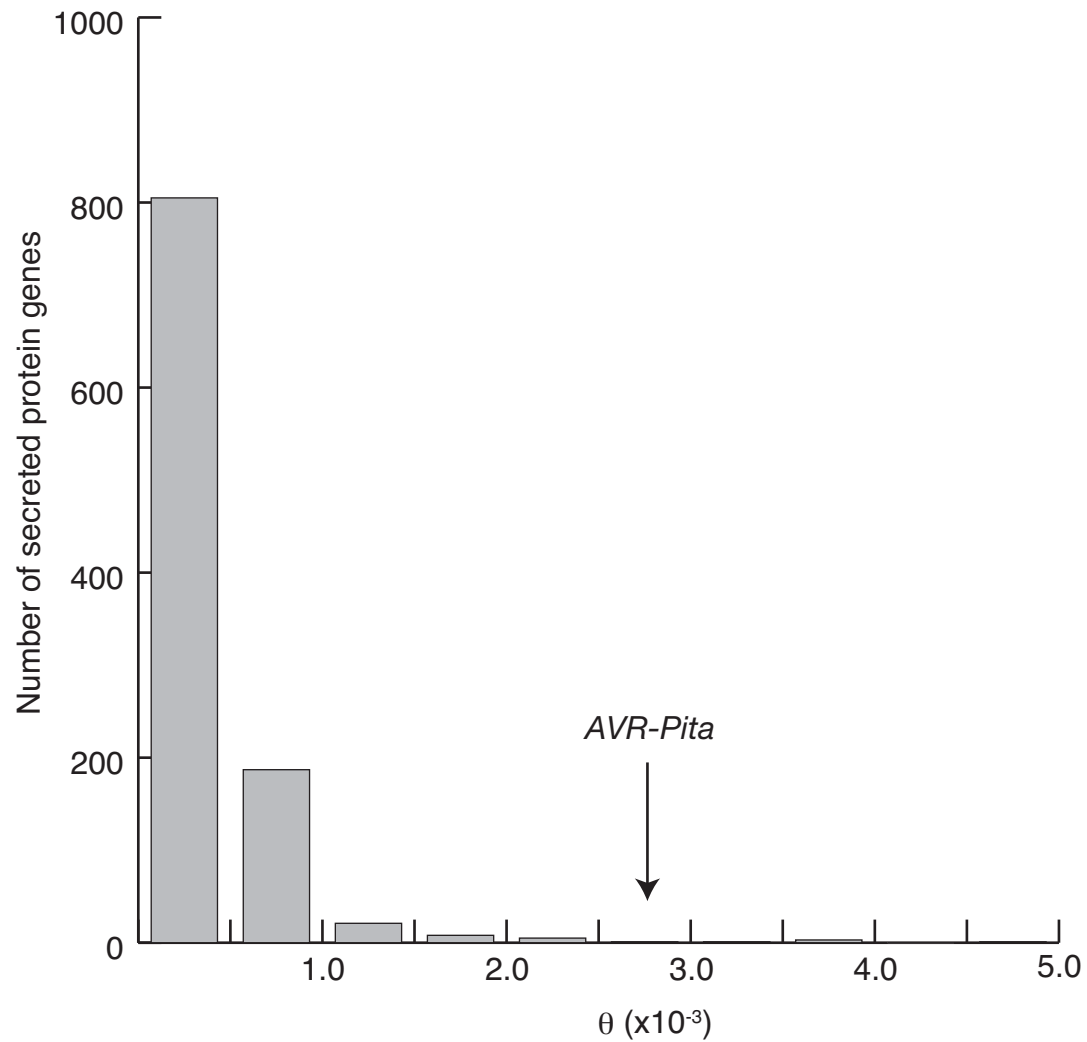

**Supplemental Figure 2. Frequency distribution of nucleotide diversity among 1,032 loci of *M. oryzae* putative secreted protein genes.**

Nucleotide diversity ( $\theta$ ; Watterson 1975) is given in x-axis and number of loci in the given  $\theta$  range is shown in the y-axis. Out of 1,032 loci, 805 were monomorphic.  $\theta$  of *AVR-Pita* (MG11081.4) is 0.0029.

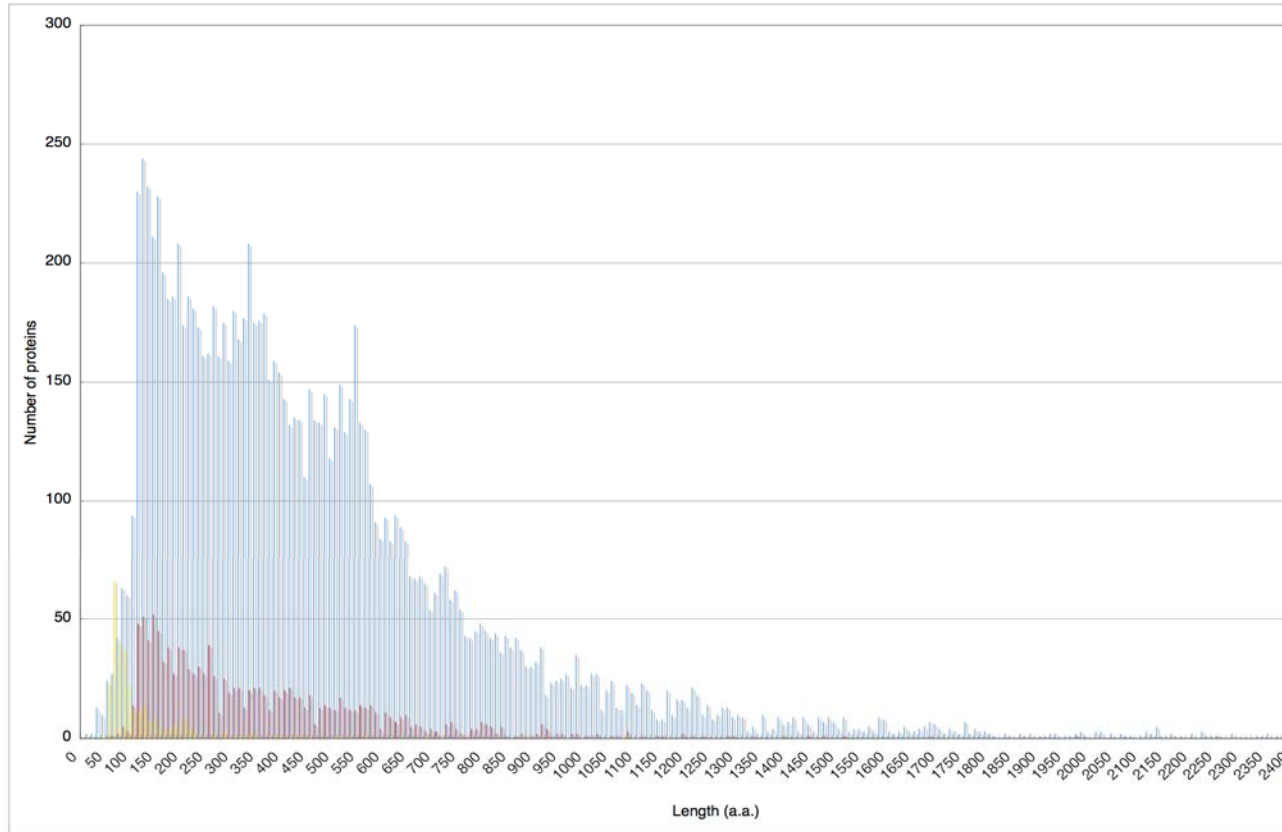

**Supplemental Figure 3. Size distribution of predicted proteins of *M. oryzae*.** Size distribution of 11,109 predicted proteins of Isolate 70-15 (blue), 1,306 predicted secreted proteins of isolate 70-15 (red), and 316 predicted secreted proteins in Ina168-unmapped regions (yellow).

a) pex22

```
ATCGCTTTGC CCTCATTGCA CACAACAACC TCCATTAATA TACATACATA TTTCTATTCC 60
CTTTCATAA CAGTATCCCT ACCCGCCAGC CCCATACACG AAAATTCTCA AAATGCAATT 120
TTCGACAATT TTCATCCCCT TTGCCTTAGC TGCTCTAAAA GTAAGCGCTG CGCCAGCTAG 180
ATTTTGCGTC TATTACGACG GCCACCTTCC CGCGACACGT GTCCTGCTTA TGTACGTTAG 240
AATCGGCACT ACAGCGACTA TTACGGCCCC TGGGCACGAA TTCGAAGTTG AAGCAAAAAGA 300
CCAGAATTGC AAAGTTATTC TCACCAATGG CAAACAAGCA CCGGATTGGC TTGCTGCCGA 360
GCCTTACTAG GTTTAAAACG GAAGAGCAGC AGCTTGCTGG TTAAACTTCA AAATAAACGC 420
CAACTCAGTT ACTACTTACA ATACTATGAT TTCTGCCGAA AATTCCCTCT CCCCCTACCG 480
TACGTGTATA CCTGGGCTTT TACCAGTTT ACTGTTTACG GGAGGAATCA AGTACCTAAA 540
TTTATTTTTT CCTTCAAAT GATTACCAA GTCGGAAACG CCCACAAGGC CTACACCACT 600
CGACGATGAA ACCAGGGTAG GCTTTTGTTA CCTGTGCAAT CATGGCAAAT TATCACTCTT 660
TAGCGAAAGT AAATACAAAC AAACGAGTTT CCAGG 695
```

Tag3294  
6 counts

b) pex33

```
ATTTTTCATC TAAAACTAA ACATTTAAAT TCAGCTTCAA ATATACCAA ATCCCCTTTT 60
ATTCCTTCCA ATTTACCAA ATGCAACTTT CAAAATTAC TTTCGCTATT GCATTATATG 120
CAATCGGAAT CGCAGCACTT CCCACTCCGG CCAGCCTGAA TGGCAACACT GAGGTCGCAA 180
CCATCTCCGA CGTTAAACTT GAGGCCCGCA GCGACACCAC TTATCATAAA TGCTCCAAAT 240
GCGGTTATGG CAGCGATGAT TCCGACGCGT ATTTTAATCA TAAATGCAAC TAAATCGCATA 300
CAAAGTAAGC TGGATTTTTT CAAACGAGCG GCGGACAGTT ATGGACTATT GCGGGAATTT 360
CAAGGATAGG AAAAGCCAAT TTGAAATATC CGGAATACTT TTTCCAAGCT TAACCATTAA 420
ATAACATGTC TAAATCAAT CTACCTTTCG CGTTTAAA 458
```

Tag1145  
14 counts

c)

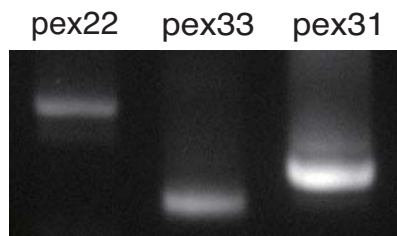

**Supplemental Figure 4. pex22, pex33, pex31 transcripts are expressed during *M. oryzae* infection of rice leaf sheath as revealed by SuperSAGE and 3'-RACE RT-PCR.**

a) DNA sequence of the pex22 gene region. Pex22 ORF is indicated by red color. Location of the SuperSAGE tag Tag3294 is underlined. b) DNA sequence of the pex33 gene region. ORF is indicated by red color. Location of the SuperSAGE tag Tag1145 is underlined. c) 3'-RACE RT-PCR results of pex22, pex33 and pex31.

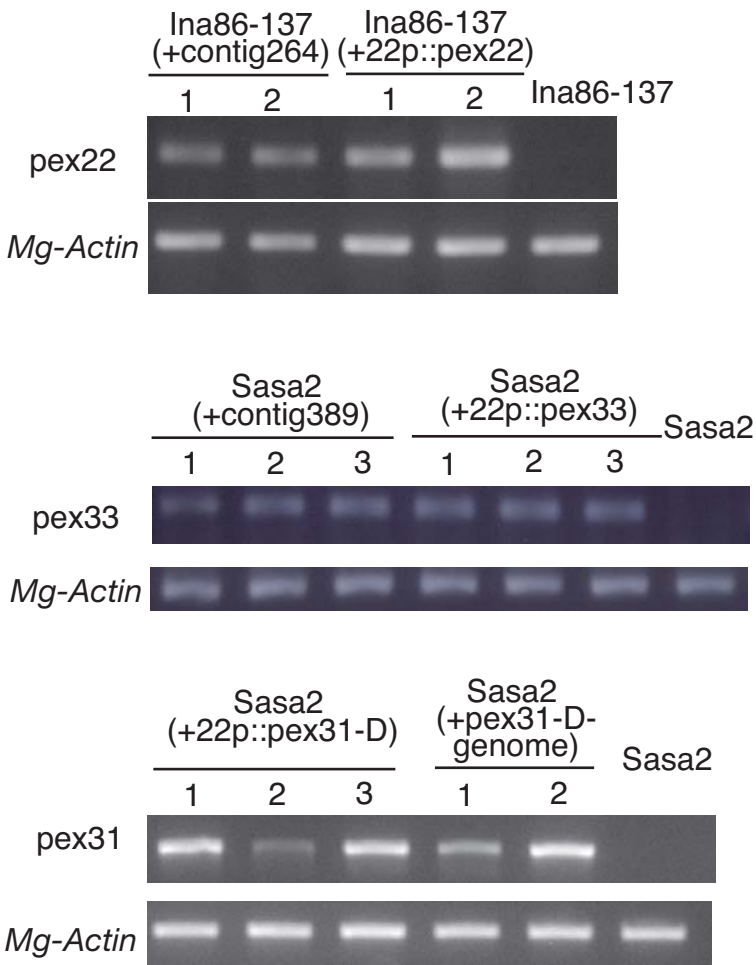

**Supplemental Figure 5. Confirmation of active transcription of pex transgenes by RT-PCR in *M. oryzae* transformants during infection.**

a)

*O. sativa*

| <i>M. oryzae</i>         | Sasanishiki<br>( <i>Pia</i> <sup>+</sup> )                                        | Shin-2<br>( <i>Pia</i> <sup>-</sup> )                                             |
|--------------------------|-----------------------------------------------------------------------------------|-----------------------------------------------------------------------------------|
| TH68-141                 |  |  |
| TH68-141<br>(+contig264) |  |  |

b)

*O. sativa*

| <i>M. oryzae</i>           | Kakehashi<br>( <i>Pii</i> <sup>+</sup> )                                            | Shin-2<br>( <i>Pii</i> <sup>-</sup> )                                               |
|----------------------------|-------------------------------------------------------------------------------------|-------------------------------------------------------------------------------------|
| Ina86-137                  |    |    |
| Ina86-137<br>(+contig389)  |    |    |
| Ina86-137<br>(+22p::pex33) |  |  |

c)

*O. sativa*

| <i>M. oryzae</i>           | Kanto51<br>( <i>Pik</i> <sup>+</sup> )                                              | Tsuyuake<br>( <i>Pik-m</i> <sup>+</sup> )                                           | K60<br>( <i>Pik-p</i> <sup>+</sup> )                                                 | Shin-2<br>( <i>Pik</i> , <i>Pik-m</i> , <i>Pik-p</i> <sup>-</sup> )                   |
|----------------------------|-------------------------------------------------------------------------------------|-------------------------------------------------------------------------------------|--------------------------------------------------------------------------------------|---------------------------------------------------------------------------------------|
| Ina72                      |  |  |  |  |
| Ina72<br>(+pex31-D-genome) |  |  |  |  |
| Ina72<br>(+22p::pex31-D)   |  |  |  |  |

**Supplemental Figure 6. Transformation of *M. oryzae* isolates with pex22, pex33 and pex31-D complements *AVR-Pia*, *AVR-Pii* and *AVR-Pik/km/kp*, respectively.**

Names of isolates and DNA fragments used for transformation are given in the left of each panel. (a) Transformation of TH68-141 with pex22 conferred the *AVR-Pia* phenotype. (b) Transformation of Ina86-137 with pex33 conferred the *AVR-Pii* phenotype. (c) Transformation of Ina72 with pex31 conferred the *AVR-Pik/km/kp* phenotypes.

a)

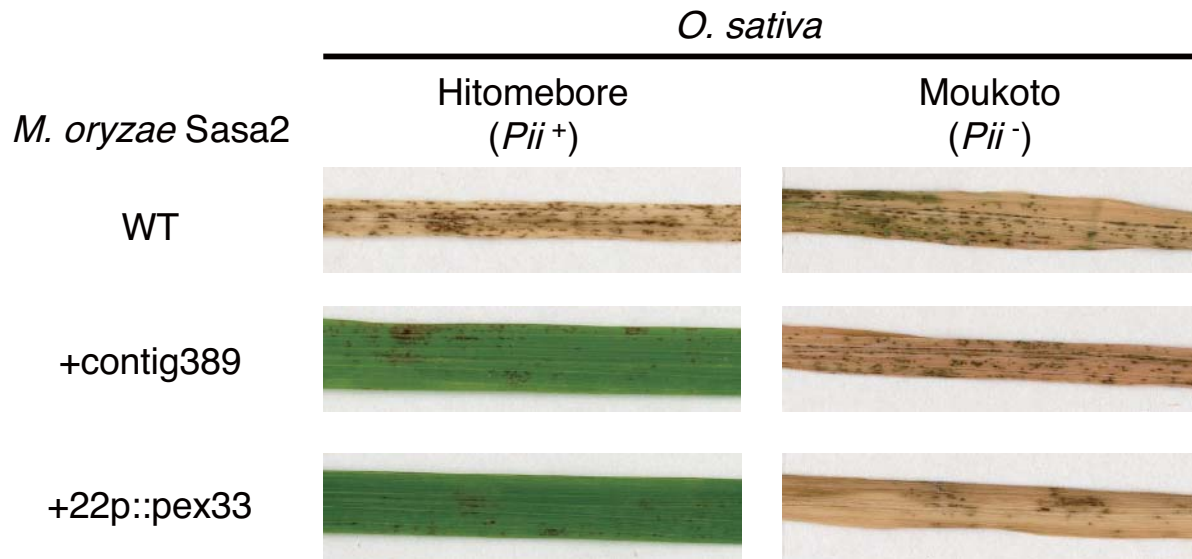

b)

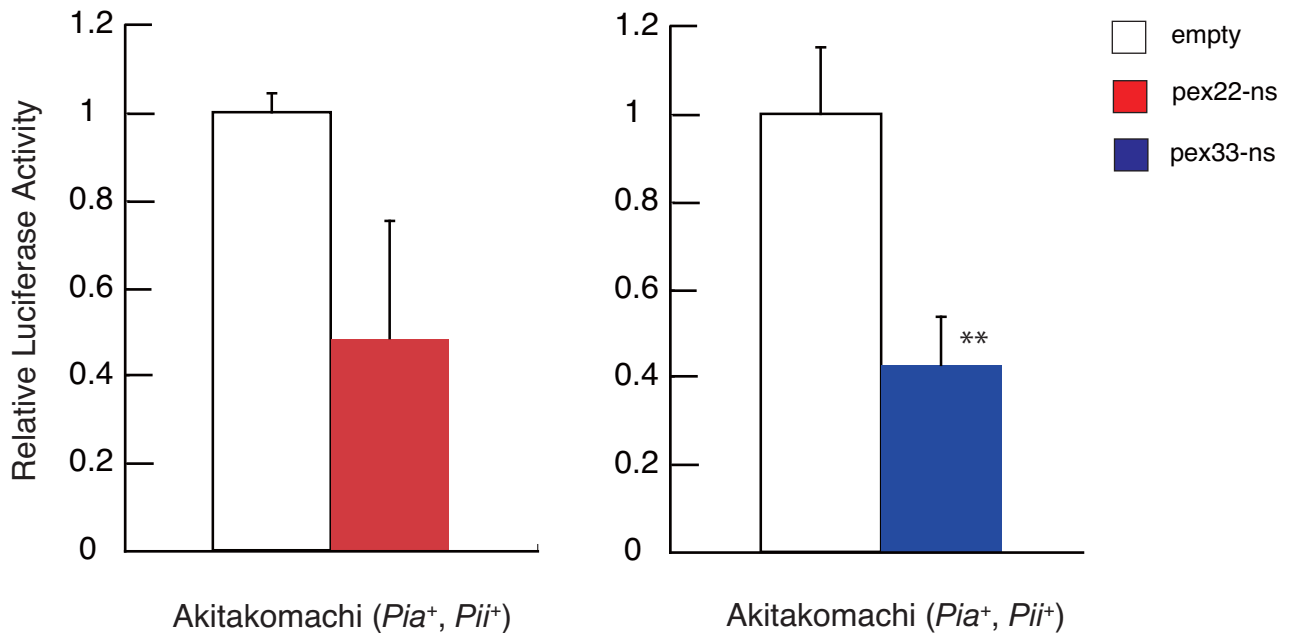

**Supplemental Figure 7. Additional results of interactions between *M. oryzae* and rice.** a) Results of interaction between *M. oryzae* and rice. The isolate Sasa2 is compatible with a rice cultivar Hitomebore harboring the R-gene *Pii*. Sasa2 transformed with contig389 (+contig389) as well as Sasa2 transformed with a fragment containing pex22 promoter fused with pex33 ORF (+22p::pex33) were incompatible with Hitomebore. Sasa2, [Sasa2(+contig389\*)], [Sasa2 (+22p::pex33)] are all compatible with a rice cultivar Moukoto lacking *Pii* suggesting that the effect of transformation with contig389 and 22p::pex33 is *Pii* dependent. Photos were taken 10 days after inoculation with  $3 \times 10^5$  conidia/ml (containing 0.01 % tween 20) of each strain. b) Interaction between AVR candidates and *P*-genes causes cell death in rice protoplasts. Rice cell viability after

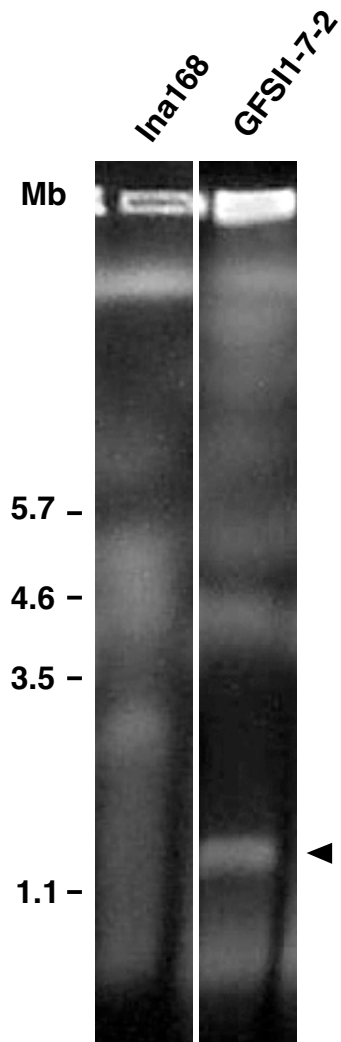

**Supplemental Figure 8. Pulsed field gel electrophoresis images of chromosomes of Ina168 and GFSI1-7-2 isolates of *M. oryzae*.**  
The typical 1.2 Mb supernumerary chromosome of GFSI1-7-2 is indicated by an arrowhead.





Supplemental Table 1.

46 isolates of *M. oryzae* used for EcoTILLING and phylogenetic analysis

| Code no. | Code no. in Table1 | Isolate      | Host                | Race    | Country   |
|----------|--------------------|--------------|---------------------|---------|-----------|
| 1        | 2                  | 70-15        | <i>Oryza sativa</i> | Unknown | Guiana    |
| 2        |                    | GUY11        | <i>Oryza sativa</i> | 137.5   | Guiana    |
| 3        |                    | 70-6         | <i>Oryza sativa</i> | Unknown | Guiana    |
| 4        |                    | Br13         | <i>Oryza sativa</i> | 102     | Brazil    |
| 5        | 15                 | Br18         | <i>Oryza sativa</i> | 176     | Brazil    |
| 6        | 22                 | Br10         | <i>Oryza sativa</i> | 403     | Brazil    |
| 7        |                    | Br15         | <i>Oryza sativa</i> | 507     | Brazil    |
| 8        |                    | VHT6.1       | <i>Oryza sativa</i> | 002     | Vietnam   |
| 9        |                    | VHG4.5       | <i>Oryza sativa</i> | 106     | Vietnam   |
| 10       |                    | VTB6.1       | <i>Oryza sativa</i> | Unknown | Vietnam   |
| 11       |                    | VHT3.3       | <i>Oryza sativa</i> | Unknown | Vietnam   |
| 12       |                    | PO-02-7306   | <i>Oryza sativa</i> | Unknown | Indonesia |
| 13       |                    | PO-02-7501   | <i>Oryza sativa</i> | Unknown | Indonesia |
| 14       |                    | PO-04-7501   | <i>Oryza sativa</i> | Unknown | Indonesia |
| 15       |                    | PO-12-7301-2 | <i>Oryza sativa</i> | Unknown | Indonesia |
| 16       |                    | PO-12-7301   | <i>Oryza sativa</i> | Unknown | Indonesia |
| 17       |                    | TH3          | <i>Oryza sativa</i> | 135     | Thailand  |
| 18       |                    | CHNOS60-8-1  | <i>Oryza sativa</i> | 104.4   | China     |
| 19       | 5                  | Shin85.86    | <i>Oryza sativa</i> | 001.0   | Japan     |
| 20       |                    | TH68-141     | <i>Oryza sativa</i> | 003.0   | Japan     |
| 21       |                    | Ken54-04     | <i>Oryza sativa</i> | 003.0   | Japan     |
| 22       |                    | Ken54-20     | <i>Oryza sativa</i> | 003.0   | Japan     |
| 23       |                    | 0903.4       | <i>Oryza sativa</i> | 003     | Japan     |
| 24       |                    | TH83-05-15-3 | <i>Oryza sativa</i> | 003.0   | Japan     |
| 25       |                    | Ina85-182    | <i>Oryza sativa</i> | 103.0   | Japan     |
| 26       | 18                 | Ina86-137    | <i>Oryza sativa</i> | 007.0   | Japan     |
| 27       | 17                 | Hoku1        | <i>Oryza sativa</i> | 007.0   | Japan     |
| 28       | 19                 | 2012-1       | <i>Oryza sativa</i> | 007     | Japan     |

|    |    |             |                     |       |       |
|----|----|-------------|---------------------|-------|-------|
| 29 | 20 | 2403-1      | <i>Oryza sativa</i> | 007   | Japan |
| 30 |    | 22-4-1-1    | <i>Oryza sativa</i> | 107.0 | Japan |
| 31 |    | Naga69-150  | <i>Oryza sativa</i> | 007   | Japan |
| 32 | 16 | TH87-20-BII | <i>Oryza sativa</i> | 007.2 | Japan |
| 33 | 6  | Ina72       | <i>Oryza sativa</i> | 031.0 | Japan |
| 34 | 9  | 1836-3      | <i>Oryza sativa</i> | 033   | Japan |
| 35 | 10 | TH68-126    | <i>Oryza sativa</i> | 033.1 | Japan |
| 36 | 7  | TH68-140    | <i>Oryza sativa</i> | 035.1 | Japan |
| 37 | 11 | 24-22-1-1   | <i>Oryza sativa</i> | 037.1 | Japan |
| 38 | 12 | 9505-3      | <i>Oryza sativa</i> | 037.1 | Japan |
| 39 | 13 | Sasa2       | <i>Oryza sativa</i> | 037.1 | Japan |
| 40 | 8  | TH69-8      | <i>Oryza sativa</i> | 071.1 | Japan |
| 41 | 1  | Ina168      | <i>Oryza sativa</i> | 101.1 | Japan |
| 42 |    | Ken53-33    | <i>Oryza sativa</i> | 137.1 | Japan |
| 43 | 14 | TH78-15     | <i>Oryza sativa</i> | 177.1 | Japan |
| 44 | 23 | P-2b        | <i>Oryza sativa</i> | 303.1 | Japan |
| 45 | 21 | 88A         | <i>Oryza sativa</i> | 433   | Japan |
| 46 |    | P2          | <i>Oryza sativa</i> | 003   | Japan |

---

Supplemental Table 2. A list of *M. oryzae* putative secreted proteins possessing the [RK]CxxCxxxxxxxxxxH] motif

>gi\_39968261\_ref\_XP\_365521.1\_predicted protein [Magnaporthe grisea 70-15]  
MQISVSQVLVTLAGLIMGASARLHSAAVCVQNRSYGSTGNGTPQGITYGSYVDYEIDSAATQCACNFYRNR  
HTGNNQWDSPCDVCVFDGIQCLSNGWHLGGDEITYYCEKLCNSQGAQAN

>gi\_39955784\_ref\_XP\_364190.1\_hypothetical protein MG09035.4 [Magnaporthe grisea 70-15]  
MQIFNIVQVLGLLAVGASALPTPANVGAVQPVVEGSQLQARSSNFYSAGWTQYPSANSYGPSNSASTYYYYK  
CNHCGKHTKEESQKYHQENSHKKGESNYSEVQA

>gi\_39946562\_ref\_XP\_362818.1\_hypothetical protein MG08230.4 [Magnaporthe grisea 70-15]  
MQIFKIVQVLGLLAVGTSALPAPANPAVQPAQGGQLAVHGQPASCPEPCRDVQGAKPGHLQARSRFYAT  
SDTGRPLANSGYPTHGYRDAYRCLYCGAVRDDVSAVQDHITYRHSNRGGDTSNYDTTTRVRRDR

>gi\_39946240\_ref\_XP\_362657.1\_predicted protein [Magnaporthe grisea 70-15]  
MHTYKFIQIALLFASVALAIPPPSPNPPPPVQLPNSETKSNRLVSHSCEFCGVVVKPSGPAYLEHYHQN  
HREEVWGKLATPSPNPPPPVPTQKVETHAPKTHGCEWCNKVEPSGPAYIKHYKENHEDQVWGKWAGQDAK  
ASP

>gi\_39945196\_ref\_XP\_362135.1\_predicted protein [Magnaporthe grisea 70-15]  
MHLSTVSQILALFTAVASSAPTSHA AVRARHVSPEADLLHVVKRGDDTDFSDWQRYSLWNKRVEALSRN  
PELVSRYGKCNCSGKGRMDENGMRRHIMFDHYSKDIPEKSAHVNKYIEFRNKGG

>gi\_39944940\_ref\_XP\_362007.1\_predicted protein [Magnaporthe grisea 70-15]  
MKYSKVSFTLALIALGATAAPTDLHKLVARGEVEVCYDPRDPRVPPLQNDPNVEKWIDDKTGHHCFA LMR  
GVQPDHPCKACQGHQADLYLDHIHCLAAGHVHANKGDSCEATRQARLD RYKTALKGFRVPYGTDISKLET  
GGKGVTFVNDPSPHKLFSGDRSLTQVVKDGNVEFVRPHGKEYRQGEDLYATIQRQWYALKA AKILKAAR  
AAKAARTPDASDAGKLEPPAKLATQQRRLDESRS AE

>gi\_39973079\_ref\_XP\_367930.1\_predicted protein [Magnaporthe grisea 70-15]  
MQLHNVCISILALLAAGVFALPAPVNPSEIQARSAADKAKPKPQTERVWMDPEAAQYLS DPRWKLVKKKY  
SCGYCDSSSSKVDKINKHRDEVHGT RQAQVDHTIYPGETRLTFERVSGYP

>gi\_39972083\_ref\_XP\_367432.1\_predicted protein [Magnaporthe grisea 70-15]  
MLPLFLVTSFLFTQFLAAAHTENFEIVKGLADKARVKLDLTGQQSYAIYEKFPKAVYNPLDYHMRLIVGH  
VECKDDNDCDFAANAFHMAHGGSCERVLGSKTNQHSRNRPWKANHYD KKDIDKPLPQKNRYQWAGPT  
RTLSYDEIYALGDKWCGSCFHSRYNKVFNNCHHFVYSLYNKIKQK

>gi\_39971991\_ref\_XP\_367386.1\_predicted protein [Magnaporthe grisea 70-15]  
MRITRALAPLGLLPLPAAAAAVVGIPLQAI DTTATASSAMEPRQAGDGS GGLKQCRDVSLVQSRPGLSL  
NDTVSATCHVGTAEYVNTLNLNECLGVDPATLELGWGRAGQLSSFCWGC ELSELETGGPDGHLAVGRVVF  
SCVCYDYQGQERATSVRLDDGGIESKDGVLACRNGKRATAIRMNPDAPVRTEPGR CNLGLGDMGYMDCIPK  
LYDGKIVPVGERNRYGSVFNDRGD

Supplemental Table 3 A list of plasmids used for the genetic transformation of *M. oryzae*.

| Plasmid name           | Sources | Description                        | Construction methods                                                                                                                                                                                                                                                                                                                 | <i>M. oryzae</i> isolates used for transformation                                                     |
|------------------------|---------|------------------------------------|--------------------------------------------------------------------------------------------------------------------------------------------------------------------------------------------------------------------------------------------------------------------------------------------------------------------------------------|-------------------------------------------------------------------------------------------------------|
| pCB1004-pex22          | pCB1004 | 2.2 Kb fragment containing pex22   | The 2.2 Kb fragment was amplified with the primers NotI-pex22-U1 (5'-ATAAGAATGCGGCCGCTTTCGTGACAGGCACGTCGGG-3'; NotI site is underlined) and XbaI-pex22-L1 (5'-GCTCTAGAACACGAGAATCAAACCTGTA CAGACAGGTGGGTGGGC-3'; XbaI site is underlined) using genomic DNA of Ina168 isolate as template, and inserted into pCB1004.                | TH68-141 and Ina86-137 isolates that do not have <i>AVR-Pia</i> locus.                                |
| pCB1531-pex22p-EGFP    | pCB1531 | EGFP fused to pex22 promoter       | The 1.4 Kb fragment containing pex22 gene promoter was amplified with the primers NotI-pex22-U1 and XbaI-pex22p-L3 (5'-GCTCTAGAATTTTCGTGTATGGGGCTGGC GGGTAGGG-3'; XbaI site is underlined) using pCB1004-pex22 as template, and inserted into pBAGFP (Kimura et al., 2001).                                                          | -                                                                                                     |
| pCB1531-pex22p-pex22   | pCB1531 | pex22 fused to pex22 promoter      | The pex22 ORF was amplified with the primers Xba1-pex22-U2 (5'-GCTCTAGACAAAATGCATTTTTCGACAATTTC-3'; XbaI site is underlined) and BamH1-pex22-L2 (5'-CGGGATCCTAGTAAGGCTCGGCAGCAAGCC-3'; BamH1 site is underlined). EGFP in pCB1531-pex22p-EGFP was replaced with pex22.                                                               | Ina86-137 isolate that does not have <i>AVR-Pia</i> locus.                                            |
| pCB1531-pex33          | pCB1531 | 1.4 Kb fragment containing pex33   | The 1.4 Kb fragment was amplified with the primers NotI-pex33-U1 (5'-ATAAGAATGCGGCCGCTTCGCTCTTTTGAT TAAATAC-3'; NotI site is underlined) and XbaI-pex33-L1 (5'-GCTCTAGAAAACAGATTTGGAACCTTTGGT GAAAACCTAGAC-3'; XbaI site is underlined) using genomic DNA of Ina168 isolate as template, and inserted into pCB1531.                  | Sasa2 and Ina86-137 isolates that do not have <i>AVR-Pii</i> locus.                                   |
| pCB1531-pex22p-pex33   | pCB1531 | pex33 fused to pex22 promoter      | The pex33 ORF was amplified with the primers pBAFP_kozak_pex33_XbaI_F (5'-GCTCTAGACAAAATGCAACTTCCAAAAT TAC-3'; XbaI site is underlined) and pBAFP_pex33_BamHI_R (5'-CGGGATCCTTAGTTGCATTTATGATTAAATACGC-3'; BamHI site is underlined) using pCB1531-pex33 as template. EGFP in pCB1531-pex22p-EGFP was replaced with pex33.           | Sasa2 and Ina86-137 isolates that do not have <i>AVR-Pii</i> locus.                                   |
| pCB1004-pex31-D        | pCB1004 | 2.2 Kb fragment containing pex31-D | The 2.2 Kb fragment was amplified with the primers NotI-pex31-U1 (5'-ATAAGAATGCGGCCGCAAAAGGAATAAGG CCGACCTCT-3'; NotI site is underlined) and XbaI-pex31-L1 (5'-GCTCTAGATTTAAAAGCCGGGCCTTTTTTTC CCAA-3'; XbaI site is underlined) using genomic DNA of Ina86-137 isolate as template, and inserted into pCB1004.                     | Sasa2, and Ina72 isolates that do not have <i>AVR-Pik</i> , <i>AVR-Pikm</i> and <i>AVR-Pikp</i> loci. |
| pCB1531-pex22p-pex31-D | pCB1531 | pex31-D fused to pex22 promoter    | The pex31-D ORF was amplified with the primers Xba1_kozak_pex31_U1 (5'-GCTCTAGAAAAGTCAATATGCGTGTACCACTTT-3'; XbaI site is underlined) and pBAFP_pex31_BamHI_R (5'-CGGATCCTCGTCAAACCTCCCTACG-3'; BamHI site is underlined) using genomic DNA of Ina86-137 isolate as template. EGFP in pCB1531-pex22p-EGFP was replaced with pex31-D. | Sasa2, and Ina72 isolates that do not have <i>AVR-Pik</i> , <i>AVR-Pikm</i> and <i>AVR-Pikp</i> loci. |

Kimura, A, Takano, Y, Furusawa, I, Okuno, T. (2001) Peroxisomal metabolic function is required for appressorium-mediated plant infection by *Colletotrichum lagenarium*. Plant Cell 13: 1945-1957.

Supplemental Table 4. A list of transposons analyzed for the linkage with secreted protein genes

| Name                     | Accession number |
|--------------------------|------------------|
| DNA transposons          |                  |
| Pot 2                    | Z33638.1         |
| Pot 3                    | U60989.1         |
| Occan                    | AB074754.1       |
| LTR retrotransposons     |                  |
| MAGGY                    | L35053.1         |
| Pyret                    | AB062507.1       |
| MGLR-3                   | AF314096         |
| Inago1                   | AB334124.1       |
| Inago2                   | AB334125.1       |
| Non-LTR retrotransposons |                  |
| MGL (MGR583)             | AF018033         |
| Mg-SINE                  | MGU35313         |
| Other retrotransposons   |                  |
| Tf2                      | AY849688.1       |
| MINE-C                   | EF585237.1       |
| MINE-B                   | EF585236.1       |
| MINE-A                   | EF585235.1       |
| MINE                     | AJ851229.1       |

Supplemental Table 5. Primers used for plasmid construction and RT-PCR .

| Primer name              | Sequences (5' - 3')                               | Description                                                         |
|--------------------------|---------------------------------------------------|---------------------------------------------------------------------|
| NotI-pex22-U1            | ATAAGAATGCGGCCGCTTTCGTGACAGGCACGTCGGG             | Constructions of the plasmids pCB1004-pex22 and pCB1531-pex22p-EGFP |
| XbaI-pex22-L1            | GCTCTAGAACACGAGAATCAAACCTGTACAGACAGGTGGGTGG<br>GC | Constructions of the plasmid pCB1004-pex22                          |
| XbaI-pex22p-L3           | GCTCTAGAATTTTCGTGTATGGGGCTGGCGGGTAGGG             | Constructions of the plasmid pCB1531-pex22p-EGFP                    |
| Xba1-pex22-U2            | GCTCTAGACAAAATGCATTTTTCGACAATTTTC                 | Constructions of the plasmid pCB1531-pex22p-pex22                   |
| BamH1-pex22-L2           | CGGGATCCTAGTAAGGCTCGGCAGCAAGCC                    |                                                                     |
| NotI-pex33-U1            | ATAAGAATGCGGCCGCTTCGCTCTTTTGATTAATAC              | Constructions of the plasmid pCB1531-pex33                          |
| XbaI-pex33-L1            | GCTCTAGAAAACAGATTTGGAACCTTGGTGAAAACCTAGAC         |                                                                     |
| pBAFP_kozak_pex33_XbaI_F | GCTCTAGACCAAATGCAACTTTCCAAAATTAC                  | Constructions of the plasmid pCB1531-pex22p-pex33                   |
| pBAFP_pex33_BamHI_R      | CGGGATCCTTAGTTGCATTTATGATTAATACGC                 |                                                                     |
| NotI-pex31-U1            | ATAAGAATGCGGCCGCAAAGGAATAAGGCGGACCTCT             | Constructions of the plasmid pCB1004-pex31-D                        |
| XbaI-pex31-L1            | GCTCTAGATTAAGCCGGGCCTTTTTTCCCAA                   |                                                                     |
| Xba1_kozak_pex31_U1      | GCTCTAGAAAAGTCAATATGCGTGTTACCACTTT                | Constructions of the plasmid pCB1531-pex22p-pex31-D                 |
| pBAFP_pex31_BamHI_R      | CGGATCCTCGTCAAACCTCCCTACG                         |                                                                     |
| RTpex22-U1               | CCGCTCGAGCAAATGGCGCCAGCTAGATTTTGCG                | RT-PCR for pex22                                                    |
| RTpex22-L1               | CTAGTAAGGCTCGGCAGCAA                              |                                                                     |
| RTpex33-U1               | CTTCCCACTCCGGCCAGCCTGAATGGCA                      | RT-PCR for pex33                                                    |
| RTpex33-L1               | ATACTAGTTTAGTTGCATTTATGATTA                       |                                                                     |
| RTpex31-U1               | CGACCTAAGTCGAGAGCGAGACCTAAC                       | RT-PCR for pex31                                                    |
| RTpex31-L1               | TAAAAGCCGGGCCTTTTTTCCCAA                          |                                                                     |
| RiceActin-U1             | CTGAAGAGCATCCTGTATTG                              | RT-PCR for rice actin <i>RAc7</i>                                   |
| RiceActin-L1             | GAACCTTTCTGCTCCGATGG                              |                                                                     |
| MgActin-U1               | TCGACGTCCGAAAGGATCTGT                             | RT-PCR for <i>Magnaprothe oryzae</i> Actin                          |
| MgActin-L1               | ACTCCTGCTTCGAGATCCACATC                           |                                                                     |
